# Supplementary figures and images for: Biodegradable polyurethane nerve guide conduits with different moduli influence axon regeneration in transected peripheral nerve injury
Source: Royal Society of Chemistry journal article supplement (doi:10.1039/d1tb01236c), 2021-01-01

FIG6 C

CD68

CD86

CD206

ACTIN

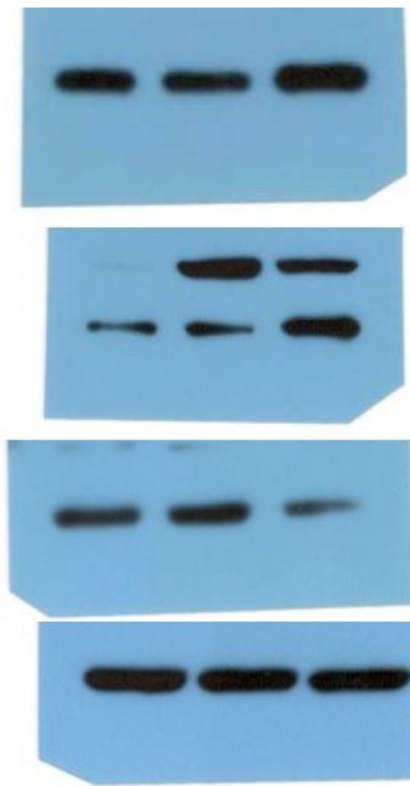

FIG7 A

FIG7 B

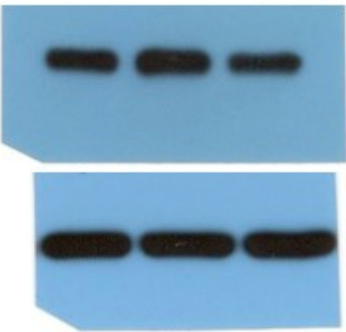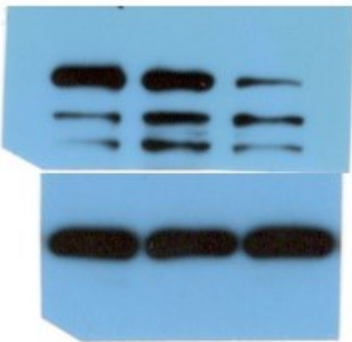

Supplement: d1tb01236c2.pdf [file d1tb01236c2.pdf]
